# Supplementary material
Source: PubMed Central journal article supplement (PMC7081893)
Supplement: JVI.02149-19-s0001.pdf [file JVI.02149-19-s0001.pdf]

**Supplementary Table 1.** Hemagglutinin (HA) and hemagglutinin inhibition (HAI) titers of the compounds using 0.5% turkey red blood cells (RBCs).

| <b>Compound<sup>1</sup></b> | <b>HA assay<br/>Drug concentration (<math>\mu\text{M}</math>)<sup>1</sup></b> | <b>HAI assay<br/>Drug concentration (<math>\mu\text{M}</math>)<sup>2</sup></b> |
|-----------------------------|-------------------------------------------------------------------------------|--------------------------------------------------------------------------------|
| AmA                         | 500                                                                           | Negative                                                                       |
| BRQ                         | Negative                                                                      | Negative                                                                       |
| 6-azauridine                | Negative                                                                      | Negative                                                                       |
| Azaribine                   | Negative                                                                      | Negative                                                                       |
| PF                          | Negative                                                                      | Negative                                                                       |
| AVN-944                     | 1,000                                                                         | Negative                                                                       |
| MMF                         | Negative                                                                      | Negative                                                                       |
| MPA                         | Negative                                                                      | Negative                                                                       |
| Obatoclax                   | Negative                                                                      | Negative                                                                       |
| OSU-03012                   | Negative                                                                      | Negative                                                                       |

<sup>1</sup> Compounds were tested using 2-fold serial dilutions, from 1,000  $\mu\text{M}$  to 1.95  $\mu\text{M}$ .

<sup>2</sup> BIRFLU: A/Puerto Rico/8/34 H1N1 (800 FFU/well).
